## Measurement of leaf day respiration using a new isotopic disequilibrium method compared with the Laisk method

Xiao Ying Gong<sup>1</sup>, Guillaume Tcherkez<sup>2</sup>, Johannes Wenig<sup>1</sup>, Rudi Schäufele<sup>1</sup>, Hans Schnyder<sup>1</sup>

<sup>1</sup> Lehrstuhl für Grünlandlehre, Technische Universität München, Alte Akademie 12, 85354 Freising, Germany.

<sup>2</sup> Research School of Biology, ANU College of Medicine, Biology and Environment, Australian National University, Canberra ACT 0200, Australia.

**Corresponding authors:** Xiao Ying Gong, Tel. +49 8161713722, Email: [xgong@wzw.tum.de](mailto:xgong@wzw.tum.de);

Rudi Schäufele, Tel. +49 8161715265, Email: [schaeufele@wzw.tum.de](mailto:schaeufele@wzw.tum.de)

### Summary

- Quantification of leaf respiration is of great importance for the understanding of plant physiology and ecosystem biogeochemical processes. Leaf respiration continues in light ( $R_L$ ) but supposedly at a lower rate compared to the dark ( $R_D$ ). Yet, there is no method for direct measurement of  $R_L$  and most available methods require unphysiological measurement conditions.
- A method based on isotopic disequilibrium quantified  $R_L$  ( $R_{L\ 13C}$ ) and mesophyll conductance of young and old fully-expanded leaves of six species compared  $R_{L\ 13C}$  to  $R_L$  values determined by the Laisk method ( $R_{L\ Laisk}$ ).
- $R_{L\ 13C}$  and  $R_{L\ Laisk}$  were consistently lower than  $R_D$ . Leaf ageing negatively affected photosynthetic performance, but had no significant effect on  $R_L$  or  $R_L/R_D$  as determined by both methods.  $R_{L\ Laisk}$  and  $R_{L\ 13C}$  were measured successively on the same leaves and correlated positively ( $r^2=0.38$ ), but average  $R_{L\ Laisk}$  was 28% lower than  $R_{L\ 13C}$ . Using  $A/C_c$  curves instead of  $A/C_i$  curves, a higher photocompensation point  $\Gamma^*$  (by 5  $\mu\text{mol mol}^{-1}$ ) was found but the correction had no influence on  $R_{L\ Laisk}$  estimates.
- The results suggest that the Laisk method underestimated  $R_L$ . The isotopic disequilibrium method is useful for assessing responses of  $R_L$  to irradiance and  $\text{CO}_2$ , improving our mechanistic understanding of  $R_L$ .

**Key words:** mitochondrial respiration, photosynthesis, carbon isotope discrimination, mesophyll conductance, photocompensation point, leaf age

## INTRODUCTION

Foliar respiration is a major component of the global carbon cycle, releasing more than three times the amount of CO<sub>2</sub> liberated by anthropogenic emission each year (Le Quere *et al.*, 2009; Beer *et al.*, 2010), if it is assumed that foliar, i.e. plant leaf respiration constitutes 50-80% of plant respiration globally (Atkin *et al.*, 2007; Lehmeier *et al.*, 2010). Thus knowledge of the drivers and controls of leaf respiration is essential for understanding plant physiology and the global carbon budget, and that knowledge is required for improving the representation of leaf respiration in climate-vegetation models (Atkin *et al.*, 2007; Heskell *et al.*, 2013). The fact that leaf respiration rate is lower in light ( $R_L$ , also termed day respiration) compared to the dark ( $R_D$ ) – when normalized to the same temperature – has long been recognized and demonstrated in leaf- (Brooks & Farquhar, 1985; Atkin *et al.*, 2000; Gong *et al.*, 2015), stand- (Schnyder *et al.*, 2003; Gong *et al.*, 2017a), and ecosystem-scale (Wehr *et al.*, 2016) studies. The inhibition of respiration by light is underpinned by the light-induced down-regulation of the activity of several enzymes of respiratory metabolism (Tcherkez *et al.*, 2005; Tcherkez *et al.*, 2012a). Yet, the quantification of  $R_L$  is technically challenging and the mechanism controlling its variation is uncertain.

In practice,  $R_L$  cannot be directly measured using conventional gas exchange measurements because  $R_L$  is masked by other concurrent, major fluxes: photosynthetic CO<sub>2</sub> uptake and photorespiratory CO<sub>2</sub> release. Net CO<sub>2</sub> assimilation rate can be expressed as:  $A = V_c - 0.5V_o - R_L$ , where  $V_c$  is the rate of carboxylation and  $V_o$  is that of oxygenation, and  $0.5V_o$  is the rate of photorespiration ( $F$ ).  $A$  can be further expressed as:

$$A = V_c (1 - \Gamma^*/C_c) - R_L \quad (1)$$

where  $\Gamma^*$  is the CO<sub>2</sub> compensation point in the absence of day respiration and  $C_c$  is the chloroplastic CO<sub>2</sub> mole fraction. At a  $C_c$  that equals to  $\Gamma^*$ ,  $A$  is equal to  $-R_L$ . Based on Eqn 1,  $R_L$  can be estimated from the common intersection of curves of net CO<sub>2</sub> assimilation rate ( $A$ ) vs. intercellular CO<sub>2</sub> concentration ( $C_i$ ) measured under low CO<sub>2</sub> and sub-saturating levels of irradiances (defined as  $R_{L, \text{Laisk}}$  here), as described in Laisk (1977) and further extended by Brooks & Farquhar (1985). This is based on the notion that at  $R_L$  is insensitive to light intensity. The Laisk method uses  $A/C_i$  curves instead of  $A/C_c$  curves to determine the common intersection, and thus gives the apparent,  $C_i$ -based CO<sub>2</sub> compensation point ( $C_i^*$ ) and  $R_L$  at  $C_i = C_i^*$ . Although it has been widely used as a standard method for determining  $R_L$  and  $\Gamma^*$  (in assuming  $\Gamma^* = C_i^*$ )

(Farquhar *et al.*, 1980; von Caemmerer, 2000; Walker & Ort, 2015), uncertainties and limitations of the Laisk method have been intensively discussed. First, ignoring the influence of mesophyll conductance ( $g_m$ ) might lead to errors in estimates of  $R_L$  and  $\Gamma^*$ , as  $\Gamma^* = C_i^* + R_L/g_m$  (Brooks & Farquhar, 1985; von Caemmerer *et al.*, 1994; Walker & Ort, 2015). Second, the measurement must be performed at very low  $CO_2$  that generally contrast with growth conditions (Villar *et al.*, 1994; Yin *et al.*, 2011). Experimental evidence has indicated a  $CO_2$  effect on respiration rate in light (Gong *et al.*, 2017a) and on the abundance of transcripts encoding enzymes of the respiratory pathway in both long-term (Leakey *et al.*, 2009) and short-term (Li *et al.*, 2013) treatments. These observations raise the concern that  $R_L$  measured by the Laisk method might differ from actual  $R_L$  under growth conditions. Similarly, other methods, such as the Kok method (Kok, 1948) and a method based on chlorophyll fluorescence (Yin *et al.*, 2011), generally must be performed at low  $CO_2$  levels or low irradiance levels and require manipulation of  $CO_2$  assimilation rate (for a review see Yin *et al.*, 2011). Furthermore, during both Kok and Laisk measurements, variations in  $C_c$  are critical but have not been accounted for, potentially leading to errors in  $R_L$  estimates (Farquhar & Busch, 2017; Tcherkez *et al.*, 2017a b).

Techniques that allow measuring  $R_L$  without requiring modifications of environmental conditions such as  $CO_2$  mole fraction or irradiance typically use carbon isotopes. The principle of deconvoluting  $CO_2$  flux components by artificially created isotopic disequilibrium (i.e. labelling) has been widely explored for i.e. photorespiration (Ludwig & Canvin, 1971) or stand- (Schnyder *et al.*, 2003; Gong *et al.*, 2017a) or ecosystem-scale (Ostler *et al.*, 2016) autotrophic respiration. This type of labelling method exploits the fact that  $CO_2$  flux components have distinct dynamics of tracer incorporation during the labelling. Abrupt changes to a  $^{13}CO_2$  atmosphere were used to monitor the liberation of  $^{12}CO_2$  by respiration in the first minutes following the isotopic changeover (Loreto *et al.*, 2001; Pinelli & Loreto, 2003). However, when using pure  $^{13}CO_2$  this technique is relatively costly and requires a  $^{13}C$ -sensitive infrared gas analyzer. Gong *et al.* (2015) described a leaf-level isotopic disequilibrium method to quantify  $R_L$  using  $CO_2$  sources of natural  $^{13}C$  abundance, which is based on concurrent measurements of photosynthetic gas exchange and  $^{13}C/^{12}C$  isotope composition (denoted as  $\delta$ , definition see methods) of  $CO_2$  fluxes, i.e. online  $^{13}C$  discrimination by net photosynthesis (online  $\Delta$ ). In other words, the  $\delta$ -value of gross fixed  $CO_2$  (associated with the flux  $V_c$ ) responds instantaneously at the onset of labelling (i.e. abrupt change of  $\delta$  of  $CO_2$  fed to leaf), with the  $\delta$ -value of the

photorespired CO<sub>2</sub> (flux  $0.5V_o$ ) following with only a short delay (half-life in the order of a few minutes (Ludwig & Canvin, 1971)). By contrast, the  $\delta$ -value of respired CO<sub>2</sub> responds rather slowly (half-life in the order of one to a few days (Schnyder *et al.*, 2003; Lehmeier *et al.*, 2008; Tcherkez *et al.*, 2012b; Gong *et al.*, 2017a)). This approach requires two sets of online  $\Delta$  measurements on similar leaves (or the very same leaves, as in this study), so as to examine the isotopic mass balance at the photosynthetic steady-state (Gong *et al.*, 2015). This method has the following advantages: (i)  $R_L$  measurements can be done at any setting of environmental parameters, e.g. identical to growth conditions; (ii) it measures  $R_L$  at the photosynthetic steady-state without manipulation of the photosynthesis rate; (iii) it simultaneously provides a reliable measurement on mesophyll conductance ( $g_m$ ), another important parameter. As it relies on the measurements of  $\delta$ -values and CO<sub>2</sub> exchange rates, diffusive leaks across the gasket of leaf cuvette must be minimized (Gong *et al.*, 2017b) or accounted for (Gong *et al.*, 2015).

Here, we use the isotopic disequilibrium method (presented by Gong *et al.* 2015) to measure  $R_L$  ( $R_{L\ 13C}$ ) on single leaves, and compare the results with the Laisk method ( $R_{L\ Laisk}$ ) applied to the very same leaves. Thus, our objectives were to answer the following questions. (i) Does the isotopic disequilibrium method also show an inhibition of leaf respiration by light? (ii) Do  $R_L$  estimates from isotopic disequilibrium agree with those from the Laisk method for different species and leaves of different age effects? Or (iii) is there any consistent offset in  $R_L$  estimates obtained with the two methods, and if yes, is the offset correlated to leaf age or simply due to assumptions on internal/mesophyll conductance? To this end, <sup>13</sup>CO<sub>2</sub>/<sup>12</sup>CO<sub>2</sub> exchange of leaves from plants grown with ambient CO<sub>2</sub> with a  $\delta^{13}C$  of CO<sub>2</sub> ( $\delta^{13}C_{CO_2}$ ) near  $-10\text{‰}$  was measured sequentially in the presence of CO<sub>2</sub> with a  $\delta^{13}C_{CO_2}$  of  $-31.2\text{‰}$  and  $-6.3\text{‰}$ , and  $R_L$  of leaves was solved using isotopic mass balance equations. These measurements were immediately followed by determinations of  $R_{L\ Laisk}$ . The comparison of  $R_{L\ 13C}$  and  $R_{L\ Laisk}$  was performed on both young and old mature leaves of two grass and four legume species. Villar *et al.* (1995) have reported that ageing of leaves of an evergreen shrub led to a reduction of  $R_{L\ Laisk}/R_D$  from 0.5 to 0.2. This is the reason why we included young and old leaves, since it might increase the variation range of  $R_L$  and thus enhance the method comparison. In addition, we estimated  $g_m$  of every leaf, so that  $A/C_i$  curves could be converted to  $A/C_c$  curves to estimate  $\Gamma^*$  and  $R_{L\ Laisk}$  based on the common intersection of  $A/C_c$  curves.

## MATERIALS AND METHODS

### Plant material and growth conditions

Six herbaceous plant species were used, namely barley (*Hordeum vulgare*), wheat (*Triticum aestivum*), castor bean (*Ricinus communis*), French bean (*Phaseolus vulgaris*), soybean (*Glycine max*) and broad bean (*Vicia faba*). Plants were grown from seed in plastic pots filled with quartz sand, placed in a growth chamber (PGR15, Conviron, Winnipeg, Canada) and supplied with a modified Hoagland nutrient solution with 7.5 mM nitrate (cf. [Gong et al., 2017b](#)) every two to three days. Environmental conditions during plant growth were: a photosynthetic photon flux density (PPFD) of  $700 \mu\text{mol m}^{-2} \text{s}^{-1}$  during the 12 h-long photoperiod per day, ambient CO<sub>2</sub> concentration ([CO<sub>2</sub>]) of about  $400 \mu\text{mol mol}^{-1}$ , air temperature of 22 °C during photo- and dark-periods, relative humidity of 50% during photoperiod and 60% during dark period. The density of plants in the growth chamber was rather low, thus leaves were not shaded. Young leaves, defined as the youngest fully expanded leaves, were measured when plants reached a stage of having 3-4 mature leaves per branch/tiller. Old leaves, defined as two age categories older than the measured young leaves, were measured about 10 days later. At that time plants had 5-7 mature leaves per branch/tiller. For dicots, the fully expanded terminal leaflets were measured. Young leaves were measured for all species, while old leaves of *G. max* and *V. faba* were not measured.

### <sup>13</sup>CO<sub>2</sub>/<sup>12</sup>CO<sub>2</sub> gas exchange facilities

<sup>13</sup>CO<sub>2</sub>/<sup>12</sup>CO<sub>2</sub> gas exchange and labelling were performed using the protocols and facilities described in [Gong et al. \(2015\)](#) with modifications and advancements as follows. The approaches in [Gong et al. \(2015\)](#) provided a mean leak coefficient and a  $R_L/A$  for a group of similar leaves (same species and age, treated as replicates). In this study, leak coefficients were measured for each leaf and used for the correction of its gas exchange data, using the equations in [Gong et al., \(2015\)](#). To quantify  $R_L$ , the two components of  $A$  must be separated, as  $A = P - R_L$ , where  $P$  is the apparent photosynthesis rate ( $P = V_c - F$ ). Briefly, we switch the CO<sub>2</sub> source supplied to leaf photosynthesis to create isotopic disequilibrium between  $P$  and  $R_L$ , namely,  $P$  will be immediately labelled while  $R_L$  is fed by substrate formed during plant growth (old carbon) ([Gong et al., 2015](#)), thus  $R_L$  can be solved by isotopic mass balance (see below).

The leaf-level  $^{13}\text{CO}_2/^{12}\text{CO}_2$  gas exchange and labelling system included a portable  $\text{CO}_2$  exchange system (LI-6400, LI-COR Inc., Lincoln, USA) housed in a gas exchange mesocosm (chamber 1, cf. [Gong \*et al.\*, 2015](#); [Gong \*et al.\*, 2017b](#)), and another gas exchange mesocosm (chamber 2) for the purpose of providing labelling  $\text{CO}_2$ . The air supply to both mesocosms and the LI-6400 was mixed from  $\text{CO}_2$ -free, dry air (with 21%  $\text{O}_2$ ) and  $\text{CO}_2$  of known  $\delta^{13}\text{C}_{\text{CO}_2}$  (cf. [\(Schnyder \*et al.\*, 2003\)](#), with  $\delta^{13}\text{C}$  denoting the  $^{13}\text{C}$  composition of a sample defined as the relative deviation of its  $^{13}\text{C}/^{12}\text{C}$  ratio ( $R_{\text{sample}}$ ) to that of the international VPDB standard ( $R_{\text{VPDB}}$ ):  $\delta^{13}\text{C} = R_{\text{sample}} / R_{\text{VPDB}} - 1$ .  $[\text{CO}_2]$  inside chamber 1 was monitored with an infrared gas analyzer (LI-6262, LI-COR Inc., Lincoln, USA). During leaf gas exchange measurements, the plants to be measured and the sensor head of the LI-6400 were placed inside the chamber 1. Using this setup, we separately controlled the  $\text{CO}_2$  concentration and  $\delta^{13}\text{C}_{\text{CO}_2}$  in the leaf cuvette and growth chambers. The growth chamber and leaf cuvette systems were coupled to a continuous-flow stable isotope ratio mass spectrometer (IRMS; Delta<sup>plus</sup> Advantage equipped with GasBench II, ThermoFinnigan, Bremen, Germany) for  $^{13}\text{C}$  analysis of the sample air. The whole-system precision of repeated measurements on  $\delta^{13}\text{C}$  was 0.09‰ (SD,  $n=50$ ). For further details of the method see [Gong \*et al.\* \(2015\)](#) and [Gong \*et al.\* \(2017b\)](#).

### Determinations of $K_{\text{CO}_2}$ , $R_{\text{D}}$

Measurements of each leaf started with the determination of the cuvette leak coefficient for  $\text{CO}_2$  ( $K_{\text{CO}_2}$ ) with the leaf present in the cuvette during these measurements ([Gong \*et al.\*, 2015](#)). Each leaf was held in the leaf cuvette of the LI-6400 for more than 20 min in the dark, at a constant  $[\text{CO}_2]$  of  $488 \pm 9$  (SD)  $\mu\text{mol mol}^{-1}$  in the leaf cuvette ( $C_{\text{out}}$ ) and  $400 \mu\text{mol mol}^{-1}$  in the chamber 1 ( $C_{\text{M}}$ ) that housed the LI-6400 measurement head (detailed measurement conditions are shown in [Table S1](#)). When gas exchange had reached a constant rate, gas exchange parameters, including  $[\text{CO}_2]$  and the  $\delta^{13}\text{C}$  of the incoming ( $C_{\text{in}}$  and  $\delta_{\text{in}}$ ) and outgoing cuvette air ( $C_{\text{out}}$  and  $\delta_{\text{out}}$ ) were measured with the LI-6400 and the online IRMS. Thereafter,  $C_{\text{M}}$  was reduced to about  $200 \mu\text{mol mol}^{-1}$  and the same gas exchange parameters were measured at steady-state. Since manipulating  $C_{\text{M}}$  should only affect the diffusive leak between the chamber 1 housing the leaf gas exchange equipment and the internal space of the leaf cuvette but not  $R_{\text{D}}$ ,  $K_{\text{CO}_2}$  was determined as the slope of the observed net  $\text{CO}_2$  exchange rate in the dark ( $N_{\text{D}}$ ) and  $(C_{\text{M}} - C_{\text{out}})/s$  relationship as:

$$N_{\text{D}} = R_{\text{D}} + K_{\text{CO}_2} (C_{\text{M}} - C_{\text{out}})/s, \quad (2)$$

where  $s$  is the leaf area (Gong *et al.* 2015). Knowing the  $K_{CO_2}$  of each intact leaf,  $CO_2$  exchange data were corrected as shown in Gong *et al.* (2015) and  $R_D$  determined. Since leak coefficients for  $^{12}CO_2$  and  $^{13}CO_2$  were virtually the same (Gong *et al.*, 2015),  $K_{CO_2}$  was used to correct both  $^{12}CO_2$  and  $^{13}CO_2$  flux data. Before all calculations, data of  $\delta$  and rates of  $CO_2$  fluxes were corrected for leak artefact using  $K_{CO_2}$  of individual leaves and equations in Gong *et al.* (2015).

$\delta^{13}C$  of  $R_D$  was calculated as:

$$\delta_{RD} = (\delta_{in} C_{in} - \delta_{out} C_{out}) / (C_{in} - C_{out}), \quad (3)$$

with  $\delta_{in}$  and  $\delta_{out}$  are  $\delta$  measured at inlet and outlet air stream, respectively.

### **$^{13}C$ labelling**

After measurements of  $K_{CO_2}$ ,  $R_D$  and  $\delta_{RD}$ , the light source of the LI-6400 was switched on (PPFD  $700 \mu mol m^{-2} s^{-1}$ ) to measure the online  $\Delta$  using  $CO_2$  sources with different  $\delta^{13}C$  of  $CO_2$  ( $-6.3\%$  and  $-31.2\%$ ). The  $^{12}C/^{13}C$  discrimination associated with net photosynthesis,  $\Delta_A$ , was calculated according to Evans *et al.* (1986):  $\Delta_A = \zeta (\delta_{out} - \delta_{in}) / (1 + \delta_{out} - \zeta (\delta_{out} - \delta_{in}))$ , where  $\zeta = C_{in} / (C_{in} - C_{out})$ . Here,  $\zeta$  was below 15 during  $\Delta_A$  measurements. Measurements of  $\Delta_A$  were done in the photosynthetic steady-state: after about 30 min of stabilization in the conditions similar to that of plant growth average  $C_{out}$  of  $394 \pm 34$  (SD)  $\mu mol mol^{-1}$ , average relative humidity of  $76 \pm 10 \%$ , block temperature of  $22 \text{ }^\circ C$  (mean leaf temperature was  $23.3 \pm 0.2 \text{ }^\circ C$ , Table S1). Online  $\Delta$  was firstly measured using the depleted  $CO_2$  source ( $-31.2\%$ ), then measured with the enriched  $CO_2$  source ( $-6.3\%$ ) on each leaf. Chamber 2 was used to mix the labelling air containing the enriched  $CO_2$  with the targeted  $[CO_2]$ . When labelling start, well mixed air in Chamber 2 was supplied to the inlet of LI-6400 with a peristaltic pump. Using this setup, the labelling air can completely flush out the air in the LI-6400 system within 8 min. The second online  $\Delta$  was measured within 15 min after the start of labelling (i.e. switching of  $CO_2$  sources), and all photosynthetic gas exchange rates are not influenced by labelling, as only  $\delta^{13}C$  of  $CO_2$  fed to leaf was changed (Gong *et al.*, 2015).

### **Calculations of $R_L$**

Substituting the relationship giving the photosynthetic assimilation in the absence of day respiration  $P (= V_c - F)$  into equation (1) gives:  $A = P - R_L$  (4)

Applying isotopic mass-balance to equation (4) gives:



$$\delta_P = (\delta_A A + \delta_{RL} R_L) / (A + R_L) \quad (5)$$

where  $\delta_P$ ,  $\delta_A$ ,  $\delta_{RL}$  are the  $\delta^{13}\text{C}$  of  $P$ ,  $A$  and  $R_L$ , respectively. With the two sets of online  $\Delta$  measurements we have:

$$\delta_{P\ d} = (\delta_{A\ d} A + \delta_{RL\ d} R_L) / (A + R_L) \quad (6)$$

$$\delta_{P\ e} = (\delta_{A\ e} A + \delta_{RL\ e} R_L) / (A + R_L) \quad (7)$$

where subscripts “d” and “e” indicates parameters measured with the  $^{13}\text{C}$ -depleted and  $^{13}\text{C}$ -enriched  $\text{CO}_2$  sources, respectively. Since  $^{13}\text{C}$  discrimination in  $P$  ( $\Delta_P$ ), is independent of the  $\delta^{13}\text{C}$  of the  $\text{CO}_2$  source (Farquhar *et al.*, 1989):

$$\Delta_P = (\delta_{\text{out}\ e} - \delta_{P\ d}) / (1 + \delta_{P\ d}) = (\delta_{\text{out}\ e} - \delta_{P\ e}) / (1 + \delta_{P\ e}). \quad (8)$$

Combining the rearranged Eqn 6-8 we have:

$$R_{L13C} = A \cdot \frac{\frac{(\delta_{A\ e} - \delta_{A\ d})(1 + \Delta_P) - 1}{\delta_{\text{out}\ e} - \delta_{\text{out}\ d}}}{1 - \frac{(\delta_{RL\ e} - \delta_{RL\ d})(1 + \Delta_P)}{\delta_{\text{out}\ e} - \delta_{\text{out}\ d}}} \quad (9a)$$

Equation (9a) includes the isotope composition of day-respired  $\text{CO}_2$  (both under a  $^{13}\text{C}$ -enriched and  $^{13}\text{C}$ -depleted atmosphere) in the denominator. Under the assumption that day respiration reacts very slowly to photosynthetic input (see *Introduction*),  $\delta_{RL\ d} = \delta_{RL\ e}$  and equation (9a) rearranges to:

$$R_{L13C} = A \cdot \left( \frac{(\delta_{A\ e} - \delta_{A\ d})(1 + \Delta_P) - 1}{\delta_{\text{out}\ e} - \delta_{\text{out}\ d}} \right) \quad (9b)$$

In practice, the approximation  $\delta_{RL\ d} = \delta_{RL\ e}$  is not critical: if some C atoms photosynthetically fixed under the  $^{13}\text{C}$ -depleted atmosphere were channelled to respiratory metabolism and liberated as  $\text{CO}_2$  under the  $^{13}\text{C}$ -enriched atmosphere, this would lead to a change of a few per mils only in the denominator and the change in  $R_{L\ 13C}$  would be very small. In fact, during the first measurement phase ( $\approx 20$  min) under the  $^{13}\text{C}$ -depleted atmosphere, we expect at most 10% turnover in leaf respiratory pools (measured by Nogues *et al.* (2004) for dark respiration) meaning a maximal putative change in  $\delta_{RL}$  of about 0.6‰ (Table S2, the denominator in equation 9a would thus be equal to 0.975 instead of 1).

In Gong *et al.* (2015), the approximation that  $1 + \Delta_P = 1$  was used. Here, we applied a different approximation that  $\Delta_P = \Delta_{A\ e}$ , which was shown to be an acceptable approximation



when the enriched CO<sub>2</sub> source (−6.3‰) was close to that of the growth environment (−10‰) (Gong *et al.*, 2015).

Thus,  $R_L$  was calculated as follows:

$$R_{L13C} = A \cdot \left( \frac{(\delta_{Ae} - \delta_{Ad})(1 + \Delta_{Ae})}{\delta_{oute} - \delta_{outd}} - 1 \right) \quad (10)$$

The  $\delta$ -value of net assimilated CO<sub>2</sub> was calculated as:  $\delta_A = (\delta_{in} C_{in} - \delta_{out} C_{out}) / (C_{in} - C_{out})$ .  $R_{L13C}/R_D$  was calculated with a (small) correction accounting for the temperature difference between light and dark, using a  $Q_{10}$  of 2 (see Gong *et al.*, 2015).

### Calculation of mesophyll conductance

Mesophyll conductance ( $g_m$ ) is defined as  $g_m = A / (C_i - C_c)$  (cf. Evans *et al.*, 1986), where  $C_c$  is the CO<sub>2</sub> mole fraction at the site of carboxylation in the chloroplast. Estimation of  $C_c$  was based on the photosynthetic <sup>12</sup>C/<sup>13</sup>C discrimination model of Farquhar *et al.* (1989) (cf. Gong *et al.*, 2015). In fact, a modified equation of <sup>13</sup>C/<sup>12</sup>C discrimination that includes both mesophyll resistance and ternary effects (Farquhar & Cernusak, 2012) is:

$$\Delta_P = \frac{1}{1-t} \left[ a \frac{C_a - C_i}{C_a} \right] + \frac{1+t}{1-t} \left[ a_m \frac{C_i - C_c}{C_a} + b \frac{C_c}{C_a} - f \frac{\Gamma^*}{C_a} \right] \quad (11a)$$

while the simplified equation that excludes mesophyll resistance (or assumes infinite  $g_m$ ) can be written as:

$$\Delta_{Pi} = \frac{1}{1-t} \left[ a \frac{C_a - C_i}{C_a} \right] + \frac{1+t}{1-t} \left[ b \frac{C_i}{C_a} - f \frac{\Gamma^*}{C_a} \right] \quad (11b)$$

Therefore, the subtraction (11a) – (11b) gives:

$$\Delta_{Pi} - \Delta_P = \frac{1+t}{1-t} \cdot \frac{C_i - C_c}{C_a} (b - a_m) \quad (12)$$

where  $a = 4.4‰$ ,  $b = 28.9‰$ ,  $a_m$  combines dissolution and diffusion in the liquid phase so that  $a_m = 1.8‰$  (Evans *et al.*, 1986) and  $f = 11‰$  (Ghashghaie *et al.*, 2003; Lanigan *et al.*, 2008).  $\Gamma^*$ , was approximated to be equal to  $C_i^*$  measured by the Laisk method (see below).  $t$  represents the ternary correction factor (Farquhar & Cernusak, 2012):

$$t = (1 + a)E / (2g_{sc}), \quad (13)$$

where  $E$  is the transpiration rate and  $g_{sc}$  is the stomatal conductance to CO<sub>2</sub>. Here, we ignored the boundary layer resistance because air was well mixed in the leaf cuvette of the LI-6400

(Kromdijk *et al.*, 2010).  $\Delta_P$  can be calculated using Eqn 6-8, assuming  $\delta_{RL} = \delta_{RD}$  (Gong *et al.* 2015). Each leaf had two measurements of  $\Delta_P$  using the two  $CO_2$  sources ( $\Delta_{P_e}$  and  $\Delta_{P_d}$ , and theoretically they should be very similar and can be treated as technical replicates, see also Fig. 3), thus the mean of  $\Delta_{P_e}$  and  $\Delta_{P_d}$  was used to calculate  $C_c$  using Eqn 12.

It should be noted that equation (11a) simply represents the model of photosynthetic fractionation where the term associated with day respiration has been omitted. That is, the full model following Farquhar *et al.* (1989) notations is:

$$\Delta_A = \Delta_P - \frac{1+t}{1-t} \cdot \frac{eR_L}{kC_a} \quad (14)$$

where  $e$  is the isotope fractionation by day respiration, with respect to net fixed photosynthates which are assumed to represent the respiratory substrates. However, considering that respiratory substrate pool turn-over is slow and mostly disconnected from photosynthesis at time scales less than the duration of the measurements (30-45min), day respiration is fed by a distinct carbon source and thus equation (14) has to be changed to (Tcherkez *et al.*, 2011):

$$\Delta_A = \Delta_P - \frac{1+t}{1-t} \cdot \frac{eR_L}{A} \quad (15)$$

In Eqn 15,  $e$  is still expressed relative to net fixed  $CO_2$  (i.e.  $e = (\delta_A - \delta_{RL})/(\delta_{RL} + 1)$ ). Under our conditions,  $t$  is very small ( $< 0.1\%$ ), thus Eqn 15 can be rearranged as

$$e = (\Delta_P - \Delta_A) \cdot A / R_L. \quad (16)$$

### Measurement of $R_L$ and $C_i^*$ using the Laisk method

After online  $\Delta$  measurements, each single leaf was measured for  $R_L$  using the Laisk method (Laisk, 1977; Brooks & Farquhar, 1985) with the LI-6400 open system. Briefly,  $A/C_i$  curves were obtained at three levels of PPFD, 50-70, 100-150, and 250  $\mu\text{mol m}^{-2} \text{s}^{-1}$ , and  $C_{\text{out}}$  was decreased from 110 to 50  $\mu\text{mol mol}^{-1}$  step-wise at each PPFD. Average relative humidity was  $77 \pm 9\%$  and block temperature 22 °C (meaning that leaf temperature was  $22.4 \pm 0.2$  °C, Table S1). Again, the observed  $A$  and  $C_i$  values were firstly corrected for leak artefacts. The coordinates of the common intersection of  $A/C_i$  curves provided the estimates of  $R_{L \text{ Laisk}}$  and  $C_i^*$  (Fig. S4). We also tested the slope-intersection regression approach suggested by Walker & Ort (2015), a modified Laisk method, but it yielded very similar results (data not shown) as the common intersection approach in the original Laisk method.

Using Laisk measurements, we estimated  $R_{L \text{ Laisk CC}}$  and  $\Gamma^*$  from the  $A/C_c$  curves (cf. Fig. S4). For this purpose, we established the relationship between  $g_{sc}$  and  $g_m$  across the measured leaves, and  $g_{sc}/g_m$  was plotted against  $A$  or  $C_{out}$  to check whether the  $g_{sc}$  - to -  $g_m$  ratio was independent of photosynthesis rate or  $CO_2$  mole fraction. Using the  $g_{sc}/g_m$  relationship,  $g_m$  along  $A/C_i$  curves was estimated from measured  $g_{sc}$ , and thus  $A/C_i$  curves could be converted into  $A/C_c$  curves.

## RESULTS

### *R<sub>L</sub> across species and leaf age*

As expected, both  $R_{L \text{ Laisk}}$  and  $R_{L \text{ 13C}}$  were consistently lower than  $R_D$ , demonstrating that the labeling technique generally also shows an inhibition of leaf respiration in the light compared to the dark (Table 1). Further, leaf age had no effect on  $R_{L \text{ Laisk}}$  or  $R_{L \text{ 13C}}$  (Table 1). Also, both methods showed similar species effects: *H. vulgare* and *P. vulgaris* had higher  $R_{L \text{ Laisk}}$  and  $R_{L \text{ 13C}}$  than the other species; *T. aestivum* had the lowest  $R_{L \text{ Laisk}}$  and  $R_{L \text{ 13C}}$  of young leaves and *R. communis* the lowest  $R_{L \text{ Laisk}}$  and  $R_{L \text{ 13C}}$  of old leaves. Pooling over all  $R_{L \text{ 13C}}$  and  $R_{L \text{ Laisk}}$  paired data, a significant positive correlation was found ( $r^2=0.38$ ,  $p<0.001$ , Fig. 1). Importantly, however,  $R_{L \text{ Laisk}}$  was systematically smaller than  $R_{L \text{ 13C}}$  by 28% (averaged over all leaves), and this effect was similar for the different species and age classes (Fig. 1). As a result, the ratio of respiration in light to that in darkness at the same temperature ( $R_L/R_D$ ) was higher for the isotopic disequilibrium method than the Laisk method:  $R_{L \text{ 13C}}/R_D$  ranged between 0.6 and 1.3 with a mean of 0.9, and  $R_{L \text{ Laisk}}/R_D$  ranged between 0.4 and 0.9 with a mean of 0.7 (Fig. 2). Both measurements showed a tendency of increasing  $R_L/R_D$  with leaf ageing; however, a significant age effect on  $R_{L \text{ 13C}}/R_D$  was detected in *P. vulgaris* while a clear age effect on  $R_{L \text{ Laisk}}/R_D$  was found in *P. vulgaris*, *T. aestivum* and *R. communis* (Fig. 2).  $R_D$  was not significantly different between age classes, but differed between species, with *T. aestivum* having the smallest  $R_D$  value of all species.

### *Photosynthetic parameters*

Leaf ageing had clear effects on many gas exchange parameters (Table 1) when averaged across species. Old leaves had an approx. 30% lower net  $CO_2$  assimilation rate ( $A$ ), 58% lower stomatal conductance to water vapour ( $g_{sw}$ ), 47% lower mesophyll conductance ( $g_m$ ), 11% lower ratio of

internal-to-atmospheric CO<sub>2</sub> mole fraction ( $C_i/C_a$ ), and a 19% lower ratio of chloroplastic-to-atmospheric CO<sub>2</sub> mole fraction ( $C_c/C_a$ ), as compared to young leaves. On the other hand, old leaves had a 13% higher  $C_i^*$  and 46% higher intrinsic water-use efficiency ( $WUE_i = A/g_{sw}$ ) compared with young leaves, averaged across species (Table 1). Nevertheless,  $A$  and  $g_m$  in *P. vulgaris* did not differ significantly between the two age classes. Across individual leaves of all species and age classes,  $R_L$  was not significantly correlated to  $A$ ,  $g_{sc}$  or  $g_m$  ( $r^2 < 0.1$ ,  $p > 0.05$ ), but was significantly correlated to  $R_D$ , with both methods ( $r^2_{13C} = 0.34$ ,  $r^2_{Laisk} = 0.45$ ,  $p < 0.001$ ).

### ***Isotope fractionation and mesophyll conductance***

Carbon isotope discrimination during net CO<sub>2</sub> assimilation ( $\Delta_A$ ) showed clear differences during the two sets of online  $\Delta$  measurements (Fig. 3), that is, the observed discrimination was influenced by the isotope composition of inlet CO<sub>2</sub>. This was due to the isotopic disequilibrium between respiratory ( $R_L$ ) and photosynthetic ( $P$ ) CO<sub>2</sub> fluxes. By contrast,  $\Delta_P$  was not influenced by CO<sub>2</sub> sources in any species (Fig. 3) supporting the accuracy of flux partitioning of  $P$  and  $R_L$ . Furthermore, the calculation using Eqn 16 yielded estimates of  $e$  of  $-16.5\%$  with <sup>13</sup>C-depleted inlet CO<sub>2</sub> and  $+11.2\%$  with <sup>13</sup>C-enriched inlet CO<sub>2</sub> (averaged across species). Those estimates were close to values that could be simply computed from the  $\delta^{13}C$  difference between growth CO<sub>2</sub> source and outlet CO<sub>2</sub> (that is,  $e = \delta_{out} - \delta_{growth\ CO_2}$  where  $\delta_{growth\ CO_2} = -10\%$  and  $\delta_{out}$  denotes the isotopic composition of CO<sub>2</sub> in the leaf cuvette during measurements in light), assuming there was no fractionation between photosynthates and respired CO<sub>2</sub> (Wingate *et al.*, 2007):  $e$  obtained in this way was  $-18.3\%$  and  $+6.1\%$  with <sup>13</sup>C-depleted and <sup>13</sup>C-enriched inlet CO<sub>2</sub>, respectively. The agreement between the two calculations of  $e$  again indicates that our flux partitioning of  $P$  and  $R_L$  was performed properly.

$g_m$  was calculated from carbon isotope discrimination during apparent photosynthesis ( $\Delta_P$ ) using equation (12). As measured under conditions similar to growth conditions using our isotopic disequilibrium method,  $g_m$  and  $g_{sc}$  showed a strong linear correlation across young and old leaves of all species ( $g_{sc} = 0.67g_m + 0.01$ ,  $r^2 = 0.82$ ,  $p < 0.001$ , Fig. S1). Meanwhile,  $g_{sc}/g_m$  showed no significant correlation with  $A$  ( $p > 0.05$ ,  $r^2 < 0.1$ ) or CO<sub>2</sub> mole fraction in the leaf cuvette ( $C_{out}$ ,  $p > 0.05$ ,  $r^2 < 0.1$ ). The  $g_m$ - $g_{sc}$  relationship was used to calculate  $g_m$  of each leaf during Laisk measurements ( $A/C_i$  curves) and thus to calculate  $\Gamma^*$  and  $R_{L\ Laisk\ cc}$  using  $A/C_c$  curves (cf. Fig. S4). This established that  $C_i^*$  was generally lower than  $\Gamma^*$  with a mean absolute difference of 5  $\mu\text{mol}$

$\text{mol}^{-1}$  for both young and old leaves (Fig. 4a), while  $R_{L \text{ Laisk cc}}$  (obtained from  $A/C_c$  curves) was not different from  $R_{L \text{ Laisk}}$  (obtained from  $A/C_i$  curves; Fig. 4b). An example of the offset in the common intersection point is given in Fig. S4.

## DISCUSSION

In this work,  $R_L$  was measured using both an isotopic disequilibrium method and the classical Laisk method on single leaves of different species, and values obtained therefrom were compared.

### *Reliability of $R_L$ values derived from isotopic disequilibrium*

The present results showed a positive correlation between the two sets of  $R_L$  measurements across all species and age classes, while on average  $R_{L \text{ Laisk}}$  estimates were 28% smaller than  $R_{L \text{ }^{13}\text{C}}$ . To our knowledge, this is the first comparison of  $R_L$  estimated from the Laisk method and an isotopic disequilibrium method that does not require manipulation of photosynthetic gas exchange rates using non-physiological environmental conditions. It is not totally unexpected that the two methods provided consistently different  $R_L$  estimates, given that the measurements were performed with contrasting environmental conditions and different theoretical bases. The isotopic disequilibrium method measures  $\text{CO}_2$  efflux that is not labelled (i.e. respiration fuelled by old carbon) during leaf photosynthesis. An important assumption involved is that after a short period of labelling, no tracer (new carbon) has been incorporated into respiration. Any contribution of new carbon to the respiratory  $\text{CO}_2$  efflux will lead to an underestimation of  $R_L$ . The potential error seems to be negligible, since our calculations using Eqn 8 (Table S2) showed that this assumption might have led to a 2.5% underestimation of  $R_L$  only, thus cannot explain the offset between  $R_L$  estimates measured by the two methods. Also, in perennial ryegrass, no new carbon was observed in shoot dark respiration for about 2 h following a 1 h-long labelling period (Lehmeier *et al.*, 2008), again suggesting insignificant underestimation of  $R_L$  by short-term labelling (30-45min). The labelling dynamics in shoot respiration should be similar to that of single leaves considering that leaf respiration contributes to about half of total plant respiration (Atkin *et al.*, 2007). However, information on labelling dynamics of single leaves is currently very limited, thus the kinetics of label appearance in day respired  $\text{CO}_2$  and its putative environmental dependence should be studied in a greater number of species.

### ***Does $R_{L\text{Laisk}}$ respond to environmental conditions imposed during measurement?***

Estimates of  $R_L$  differ between methods (Villar *et al.*, 1994; Yin *et al.*, 2011), and this effect is likely related to the different measurement conditions. Importantly, the response of  $R_L$  to environmental conditions like irradiance and CO<sub>2</sub> concentration is not well understood to date, mainly due to methodological limitations. Light has long been recognized to inhibit  $R_L$  so that  $R_L$  is believed to be higher at very low light, a phenomenon that is possibly also at the origin of the Kok effect (Brooks & Farquhar, 1985; Villar *et al.*, 1994; Atkin *et al.*, 2000; Yin *et al.*, 2011). However, the effect of light at higher levels is not well documented. It is notable that both the Laisk and Kok method require manipulation of PAR, so the effect of PAR on  $R_L$  cannot be quantified with these methods. Also, uncertainty remains as to whether there is a short-term response of  $R_L$  to CO<sub>2</sub> mole fraction. Early reports of a decrease of leaf  $R_D$  with short-term increase of CO<sub>2</sub> (see the discussion by Amthor (2000) and Yin *et al.* (2011)), were suggested to be largely attributable to CO<sub>2</sub> diffusive leaks during gas exchange measurements (Amthor, 2000; Jahnke & Krewitt, 2002; Long *et al.*, 2004; Gong *et al.*, 2015). Results of the short-term CO<sub>2</sub> response of day respiration are scarce. However, using <sup>13</sup>C-labelling, it was shown that respiratory metabolism (TCA pathway) increased as CO<sub>2</sub> mole fraction decreased (Tcherkez *et al.*, 2008), while there seemed little effect on  $R_L$  assessed with the Kok method (Tcherkez *et al.*, 2012b). CO<sub>2</sub> mole fraction can potentially impact on  $R_L$  via changes in nitrogen assimilation caused by altered rates of photorespiration (Tcherkez *et al.*, 2012a; Abadie *et al.*, 2016). On the one hand, increased photorespiration at low CO<sub>2</sub> is believed to cause high mitochondrial NADH levels and thus inhibit TCA decarboxylases. On the other hand, the increased demand for carbon skeletons to assimilate nitrogen at high photorespiration should stimulate day respiratory metabolism (Abadie *et al.* 2016). However, the contribution of TCA decarboxylations to total respiratory CO<sub>2</sub> production in the light is rather small when compared to pyruvate dehydrogenation (Tcherkez *et al.*, 2008). Therefore, the net effect of CO<sub>2</sub> on  $R_L$  itself may be modest. Still, a short-term change in CO<sub>2</sub> mole fraction may in principle influence  $R_L$ , and thus the possibility that  $R_L$  is misestimated by the Laisk method cannot be excluded. This could contribute to explaining why Laisk estimates of  $R_L$  are smaller than <sup>13</sup>C-derived estimates, as shown here.

Further, the low CO<sub>2</sub> conditions used with the Laisk method may provoke a diffusive leak as the (non-controlled) CO<sub>2</sub> concentration outside the cuvette is higher than inside. That would increase the estimate  $R_L$  if not accounted for properly, further affecting the relationship between  $R_{L \text{ Laisk}}$  and  $R_{L \text{ }^{13}\text{C}}$ . In the present work, however, the leak effect was accounted for. Also, the leak coefficients of intact leaves ( $K_{\text{CO}_2}$ ) measured here were generally very low, much lower than the producer-suggested value of 0.44  $\mu\text{mol s}^{-1}$ . Nevertheless, we found a clear leak artefact on  $R_{L \text{ Laisk}}$  of *V. faba*. The diffusive leak had no significant effect on estimates of  $C_i^*$  of young leaves of *V. faba* and *R. communis* (Fig. S2). Importantly, leak artefacts on  $R_D$  are also not ignorable given that measurements of  $R_D$  of small leaves are quite close to the detecting limit of currently available infra-red gas analysers. Since  $K_{\text{CO}_2}$  may vary substantially between species and leave age classes, leak effects should be minimized (cf. Gong *et al.* 2017b) or accounted for by the measurement of the leak coefficient for every single leaf, as done here.

### ***Does $g_m$ influence $R_L$ estimates?***

Another potential uncertainty associated with the  $C_i$ -based Laisk method is the assumption on mesophyll conductance. The compensation point in the absence of day respiration,  $\Gamma^*$ , is a  $C_c$ -based value and thus should be determined from  $A/C_c$  curves rather than  $A/C_i$  curves. In other words, the use of  $A/C_i$  curves to estimate  $C_i^*$  (as a proxy of  $C_c$ ) involves the assumption that  $g_m$  is infinite. Consequently, assuming an infinite  $g_m$  might lead to errors in the estimated  $\Gamma^*$  and  $R_L$  by the Laisk method (von Caemmerer, 2013; Walker & Ort, 2015). Here,  $g_m$  of each leaf was quantified using online  $\Delta$  measurements, and demonstrated that  $g_m$  of older leaves was 47% smaller than that of young leaves, in agreement with studies using both online  $\Delta$  or fluorescence methods (reviewed in Flexas *et al.* (2008)). The estimates of  $g_m$  obtained here were not very sensitive to errors in  $\Gamma^*$ . In fact, the difference between species and age classes was not influenced by changes in  $\Gamma^*$  within 20  $\mu\text{mol mol}^{-1}$  (Fig. S3). Other methods like the constant J method were suggested to be sensitive to errors in  $\Gamma^*$  (Harley *et al.*, 1992). Furthermore, the robust relationship between  $g_{\text{sw}}$  and  $g_m$  across all species found here was similar to that reported in tree leaves (Whitehead *et al.*, 2011). Knowing the relationship between  $g_{\text{sc}}$  and  $g_m$  allowed us to estimate  $g_m$  and thus convert  $A/C_i$  curves into  $A/C_c$  curves in the Laisk method. That way, we were able to derive the parameters of interest ( $\Gamma^*$  and  $R_L$ ) from  $A/C_c$  curves (cf. Fig. S4). These calculations assumed that the  $g_{\text{sc}}-g_m$  relationship was the same under the measurement condition



of the Laisk method and normal growth condition, which is supported by the fact that  $g_{sc}$ -to- $g_m$  ratio showed no significant correlation with net assimilation rate or CO<sub>2</sub> mole fraction in the leaf cuvette. Furthermore, analyses of published data also showed a strong  $g_{sc}$  -  $g_m$  relationship across species and growth conditions (Flexas *et al.*, 2013). Importantly, however, our results show that the Laisk method based on  $A/C_i$  curves systematically underestimated  $\Gamma^*$  (by 5  $\mu\text{mol mol}^{-1}$ ) but not  $R_L$  (i.e.  $R_L$  determined from  $A/C_i$  curves and  $A/C_c$  curves were identical).

Although statistical significance was found in *T. aestivum* only, the age effect on both  $C_i^*$  and the  $C_c$ -based value of  $\Gamma^*$  suggested that there was some error in the Laisk method. In fact,  $\Gamma^*$  is given by  $[O_2]/2S_{c/o}$  (where  $[O_2]$  is oxygen mole fraction at carboxylation sites and  $S_{c/o}$  is Rubisco specificity) and is thus not expected to change with leaf age. Assuming a single conductance term from intercellular spaces ( $C_i$ ) to the site of carboxylation ( $C_c$ ) is perhaps not completely realistic, as some authors suggested that there is some resistance of the chloroplast envelope to intracellular CO<sub>2</sub> movement (von Caemmerer, 2000), thereby leading to a lack of common intersection in Laisk curves (Tholen *et al.*, 2012). According to the model of Tholen *et al.* (2012),  $\Gamma^* = C_i^* + R_L/g_{wp} - F/g_{ch}$ , with total mesophyll conductance subdivided into conductance associated with cell wall and plasmalemma ( $g_{wp}$ ) and chloroplast envelope and stroma ( $g_{ch}$ ). Under such an assumption, the offset of  $C_i^*$  and apparent  $\Gamma^*$  between age classes can be explained by a small increase in photorespiration  $F$  (according to the difference of  $C_c$ ) and a small decrease in  $g_{ch}$  with ageing. Improving the representation of mesophyll conductance in the Laisk method is beyond the scope of the present paper, but our results suggest that the estimates of  $\Gamma^*$  or  $R_L$  obtained via the Laisk method are not precise enough (Gu & Sun, 2014), and should be viewed as approximations of actual  $\Gamma^*$  and  $R_L$ .

### **Conclusions and perspectives**

This study showed a high variation in  $R_L$  of similar leaves measured by both methods, and  $R_L$  was positively correlated to  $R_D$ , but not to net CO<sub>2</sub> assimilation rate or other parameters. These observations do not support the assumption that leaf  $R_L$  is a fixed proportion of photosynthesis or maximum  $V_c$  as used in many models (cf. De Kauwe *et al.* (2016)), but suggest that scaling  $R_L$  to  $R_D$  is a more reliable approach for the modelling purpose. We found a tendency for  $R_L/R_D$  to increase during leaf aging, and this finding is not in agreement with that reported by Villar *et al.* (1995). The average age difference between young and old mature leaves was about 16-20 days

in our study, much shorter than that of tree leaves (about 2 years) in the study of Villar *et al.* (1995). Taken as a whole, our results show that  $R_L$  estimates obtained using the isotopic disequilibrium method and the Laisk method were positively correlated, but  $R_L$  estimated by the isotopic disequilibrium method was generally higher than that measured by the Laisk method. Both methods captured the difference in  $R_L$  between species but found no effect of leaf ageing. Although  $R_L$  estimates differed between measurement techniques, most leaf-level studies (including the present study) support the notion that  $R_L$  is lower than  $R_D$  (Villar *et al.*, 1994; Yin *et al.*, 2011; Gong *et al.*, 2015; Tcherkez *et al.*, 2017a). Mesocosm-scale  $^{13}\text{C}$  labelling study also showed that stand  $R_L$  is inhibited by light (Schnyder *et al.*, 2003; Gong *et al.*, 2017a). Previous comparisons between Laisk and Kok methods showed a systematic difference between  $R_L$  estimates, with  $R_L$  estimated by the Kok method being generally lower than that measured by the Laisk method (Villar *et al.*, 1994; Yin *et al.*, 2011). Also in the case of the Kok method, it has been recently suggested that the apparent inhibition of respiration by light is at least partially explained by considerable changes in  $C_c$  during the manipulation of irradiance (Farquhar & Busch, 2017), in addition to other changes such as that in photochemical yield (for a review, see Tcherkez *et al.* 2017ab). Thus, our study suggests that common methods (Laisk or Kok) likely provide underestimated  $R_L$  values and thus overestimated inhibition of day respiration by light. For the mechanistic understanding of day respiratory metabolism, the response of  $R_L$  to light and  $\text{CO}_2$  mole fraction should be assessed in further studies, and the isotopic disequilibrium method is suitable for such a purpose since it does not require irradiance and  $\text{CO}_2$  alterations.

## ACKNOWLEDGMENTS

We thank The New Phytologist Trust for supporting the 18th New Phytologist Workshop 'The Kok effect: beyond the artefact, emerging leaf mechanisms (KOALA)' Angers, France, July 2016. We also thank all participants of this workshop for enlightening discussion and comments. This research was supported by the Deutsche Forschungsgemeinschaft (DFG SCHN 557/7-1).

## AUTHOR CONTRIBUTIONS

R.S. and X.Y.G. designed and planned the research; J.W. and R.S. performed the gas exchange measurements and isotope analyses; J.W., R.S. and X.Y.G. analyzed the data; G.T., R.S., H.S., and X.Y.G. discussed the results and implications; X.Y.G. wrote the first draft, and all authors contributed to the revision.

## REFERENCES

- Abadie C, Boex-Fontvieille ERA, Carroll AJ, Tcherkez G. 2016.** In vivo stoichiometry of photorespiratory metabolism. *Nature Plants* **2**: 15220.
- Amthor JS. 2000.** The McCree-de Wit-Penning de Vries-Thornley respiration paradigms: 30 years later. *Annals of Botany* **86**(1): 1-20.
- Atkin OK, Evans JR, Ball MC, Lambers H, Pons TL. 2000.** Leaf respiration of snow gum in the light and dark. interactions between temperature and irradiance. *Plant Physiology* **122**(3): 915-923.
- Atkin OK, Scheurwater I, Pons TL. 2007.** Respiration as a percentage of daily photosynthesis in whole plants is homeostatic at moderate, but not high, growth temperatures. *New Phytologist* **174**(2): 367-380.
- Beer C, Reichstein M, Tomelleri E, Ciais P, Jung M, Carvalhais N, Rodenbeck C, Arain MA, Baldocchi D, Bonan GB, et al. 2010.** Terrestrial gross carbon dioxide uptake: global distribution and covariation with climate. *Science* **329**(5993): 834-838.
- Brooks A, Farquhar GD. 1985.** Effect of temperature on the CO<sub>2</sub>/O<sub>2</sub> specificity of ribulose-1,5-bisphosphate carboxylase / oxygenase and the rate of respiration in the light - estimates from gas-exchange measurements on spinach. *Planta* **165**(3): 397-406.
- De Kauwe MG, Lin YS, Wright IJ, Medlyn BE, Crous KY, Ellsworth DS, Maire V, Prentice IC, Atkin OK, Rogers A, et al. 2016.** A test of the 'one-point method' for estimating maximum carboxylation capacity from field-measured, light-saturated photosynthesis. *New Phytologist* **210**(3): 1130-1144.
- Evans JR, Sharkey TD, Berry JA, Farquhar GD. 1986.** Carbon isotope discrimination measured concurrently with gas-exchange to investigate CO<sub>2</sub> diffusion in leaves of higher plants. *Australian Journal of Plant Physiology* **13**(2): 281-292.
- Farquhar GD, Busch FA. 2017.** Changes in the chloroplastic CO<sub>2</sub> concentration explain much of the observed Kok effect: a model. *New Phytologist* **214**(2): 570-584.
- Farquhar GD, Cernusak LA. 2012.** Ternary effects on the gas exchange of isotopologues of carbon dioxide. *Plant, Cell and Environment* **35**(7): 1221-1231.
- Farquhar GD, Ehleringer JR, Hubick KT. 1989.** Carbon isotope discrimination and photosynthesis. *Annual Review of Plant Physiology and Plant Molecular Biology* **40**: 503-537.
- Farquhar GD, von Caemmerer S, Berry JA. 1980.** A biochemical-model of photosynthetic CO<sub>2</sub> assimilation in leaves of C<sub>3</sub> species. *Planta* **149**(1): 78-90.
- Flexas J, Niinemets U, Galle A, Barbour MM, Centritto M, Diaz-Espejo A, Douthe C, Galmes J, Ribas-Carbo M, Rodriguez P, et al. 2013.** Diffusional conductances to CO<sub>2</sub> as a target for

- increasing photosynthesis and photosynthetic water-use efficiency. *Photosynthesis Research* **117**(1-3): 45-59.
- Flexas J, Ribas-Carbo M, Diaz-Espejo A, Galmes J, Medrano H. 2008.** Mesophyll conductance to CO<sub>2</sub>: current knowledge and future prospects. *Plant, Cell and Environment* **31**(5): 602-621.
- Ghashghaie J, Badeck F-W, Lanigan G, Nogués S, Tcherkez G, Deléens E, Cornic G, Griffiths H. 2003.** Carbon isotope fractionation during dark respiration and photorespiration in C<sub>3</sub> plants. *Phytochemistry Reviews* **2**(1): 145-161.
- Gong XY, Schäufele R, Feneis W, Schnyder H. 2015.** <sup>13</sup>CO<sub>2</sub>/<sup>12</sup>CO<sub>2</sub> exchange fluxes in a clamp-on leaf cuvette: disentangling artefacts and flux components. *Plant, Cell and Environment* **38**(11): 2417-2432.
- Gong XY, Schäufele R, Lehmeier CA, Tcherkez G, Schnyder H. 2017a.** Atmospheric CO<sub>2</sub> mole fraction affects stand-scale carbon use efficiency of sunflower by stimulating respiration in light. *Plant, Cell and Environment* **40**(3): 401-412.
- Gong XY, Schäufele R, Schnyder H. 2017b.** Bundle-sheath leakiness and intrinsic water use efficiency of a perennial C<sub>4</sub> grass are increased at high vapour pressure deficit during growth. *Journal of Experimental Botany* **68**(2): 321-333.
- Gu LH, Sun Y. 2014.** Artefactual responses of mesophyll conductance to CO<sub>2</sub> and irradiance estimated with the variable *J* and online isotope discrimination methods. *Plant, Cell and Environment* **37**(5): 1231-1249.
- Harley PC, Loreto F, Dimarco G, Sharkey TD. 1992.** Theoretical considerations when estimating the mesophyll conductance to CO<sub>2</sub> flux by analysis of the response of photosynthesis to CO<sub>2</sub>. *Plant Physiology* **98**(4): 1429-1436.
- Heskel MA, Atkin OK, Turnbull MH, Griffin KL. 2013.** Bringing the Kok effect to light: A review on the integration of daytime respiration and net ecosystem exchange. *Ecosphere* **4**(8).
- Jahnke S, Krewitt M. 2002.** Atmospheric CO<sub>2</sub> concentration may directly affect leaf respiration measurement in tobacco, but not respiration itself. *Plant, Cell and Environment* **25**(5): 641-651.
- Kok B. 1948.** A critical consideration of the quantum yield of *Chlorella* photosynthesis. *Enzymologia* **13**: 1-56.
- Kromdijk J, Griffiths H, Schepers HE. 2010.** Can the progressive increase of C<sub>4</sub> bundle sheath leakiness at low PFD be explained by incomplete suppression of photorespiration? *Plant, Cell & Environment* **33**: 1935-1948.
- Laisk AK. 1977.** *Kinetics of Photosynthesis and Photorespiration in C<sub>3</sub> Plants*. Moscow: Nauka.
- Lanigan GJ, Betson N, Griffiths H, Seibt U. 2008.** Carbon isotope fractionation during photorespiration and carboxylation in *Senecio*. *Plant Physiology* **148**(4): 2013-2020.

- Le Quere C, Raupach MR, Canadell JG, Marland G, Bopp L, Ciais P, Conway TJ, Doney SC, Feely RA, Foster P, et al. 2009.** Trends in the sources and sinks of carbon dioxide. *Nature Geoscience* **2**(12): 831-836.
- Leakey ADB, Xu F, Gillespie KM, McGrath JM, Ainsworth EA, Ort DR. 2009.** Genomic basis for stimulated respiration by plants growing under elevated carbon dioxide. *Proceedings of the National Academy of Sciences of the United States of America* **106**(9): 3597-3602.
- Lehmeier CA, Lattanzi FA, Gamnitzer U, Schauffele R, Schnyder H. 2010.** Day-length effects on carbon stores for respiration of perennial ryegrass. *New Phytologist* **188**(3): 719-725.
- Lehmeier CA, Lattanzi FA, Schäufele R, Wild M, Schnyder H. 2008.** Root and shoot respiration of perennial ryegrass are supplied by the same substrate pools: assessment by dynamic  $^{13}\text{C}$  labeling and compartmental analysis of tracer kinetics. *Plant Physiology* **148**(2): 1148-1158.
- Li X, Zhang GQ, Sun B, Zhang S, Zhang YQ, Liao YWK, Zhou YH, Xia XJ, Shi K, Yu JQ. 2013.** Stimulated leaf dark respiration in tomato in an elevated carbon dioxide atmosphere. *Scientific Reports* **3**: ARTN 3433.
- Long SP, Ainsworth EA, Rogers A, Ort DR. 2004.** Rising atmospheric carbon dioxide: plants face the future. *Annual Review of Plant Biology* **55**: 591-628.
- Ludwig LJ, Canvin DT. 1971.** The rate of photorespiration during photosynthesis and the relationship of the substrate of light respiration to the products of photosynthesis in sunflower leaves. *Plant Physiology* **48**: 712-719.
- Nogues S, Tcherkez G, Cornic G, Ghashghaie J. 2004.** Respiratory carbon metabolism following illumination in intact french bean leaves using  $^{13}\text{C}/^{12}\text{C}$  isotope labeling. *Plant Physiology* **136**(2): 3245-3254.
- Ostler U, Schleip I, Lattanzi FA, Schnyder H. 2016.** Carbon dynamics in aboveground biomass of co-dominant plant species in a temperate grassland ecosystem: same or different? *New Phytologist* **210**(2): 471-484.
- Schnyder H, Schäufele R, Lötscher M, Gebbing T. 2003.** Disentangling  $\text{CO}_2$  fluxes: direct measurements of mesocosm-scale natural abundance  $^{13}\text{CO}_2/^{12}\text{CO}_2$  gas exchange,  $^{13}\text{C}$  discrimination, and labelling of  $\text{CO}_2$  exchange flux components in controlled environments. *Plant, Cell and Environment* **26**(11): 1863-1874.
- Tcherkez G, Bligny R, Gout E, Mahe A, Hodges M, Cornic G. 2008.** Respiratory metabolism of illuminated leaves depends on  $\text{CO}_2$  and  $\text{O}_2$  conditions. *Proceedings of the National Academy of Sciences of the United States of America* **105**(2): 797-802.
- Tcherkez G, Boex-Fontvieille E, Mahe A, Hodges M. 2012a.** Respiratory carbon fluxes in leaves. *Current Opinion in Plant Biology* **15**(3): 308-314.

- Tcherkez G, Cornic G, Bligny R, Gout E, Ghashghaie J. 2005.** In vivo respiratory metabolism of illuminated leaves. *Plant Physiology* **138**(3): 1596-1606.
- Tcherkez G, Gauthier P, Buckley TN, Busch FA, Barbour MM, Bruhn D, Heskell MA, Gong XY, Crous K, Griffin KL, et al. 2017a.** Tracking the origins of the Kok effect, 70 years after its discovery. *New Phytologist* **214**(2): 506-510.
- Tcherkez G, Gauthier P, Buckley TN, Busch FA, Barbour MM, Bruhn D, Heskell MA, Gong XY, Crous K, Griffin KL, et al. 2017b.** Leaf day respiration: low CO<sub>2</sub> flux but high significance for metabolism and carbon balance. *New Phytologist*, in press DOI: 10.1111/nph.14816.
- Tcherkez G, MahÉ A, GuÉRard F, Boex-Fontvieille ERA, Gout E, Lamothe M, Barbour MM, Bligny R. 2012b.** Short-term effects of CO<sub>2</sub> and O<sub>2</sub> on citrate metabolism in illuminated leaves. *Plant, Cell and Environment* **35**(12): 2208-2220.
- Tcherkez G, Mauve C, Lamothe M, Le Bras C, Grapin A. 2011.** The <sup>13</sup>C/<sup>12</sup>C isotopic signal of day-respired CO<sub>2</sub> in variegated leaves of *Pelargonium x hortorum*. *Plant, Cell and Environment* **34**(2): 270-283.
- Tholen D, Ethier G, Genty B, Pepin S, Zhu XG. 2012.** Variable mesophyll conductance revisited: theoretical background and experimental implications. *Plant, Cell and Environment* **35**(12): 2087-2103.
- Villar R, Held AA, Merino J. 1994.** Comparison of methods to estimate dark respiration in the light in leaves of two woody species. *Plant Physiology* **105**(1): 167-172.
- Villar R, Held AA, Merino J. 1995.** Dark leaf respiration in light and darkness of an evergreen and a deciduous plant-species. *Plant Physiology* **107**(2): 421-427.
- von Caemmerer S. 2000.** *Biochemical models of leaf photosynthesis*. Collingwood: CSIRO.
- von Caemmerer S. 2013.** Steady-state models of photosynthesis. *Plant, Cell and Environment* **36**(9): 1617-1630.
- von Caemmerer S, Evans JR, Hudson GS, Andrews TJ. 1994.** The kinetics of ribulose-1,5-bisphosphate carboxylase/oxygenase in vivo inferred from measurements of photosynthesis in leaves of transgenic tobacco. *Planta* **195**(1): 88-97.
- Walker BJ, Ort DR. 2015.** Improved method for measuring the apparent CO<sub>2</sub> photocompensation point resolves the impact of multiple internal conductances to CO<sub>2</sub> to net gas exchange. *Plant, Cell and Environment* **38**(11): 2462-2474.
- Wehr R, Munger JW, McManus JB, Nelson DD, Zahniser MS, Davidson EA, Wofsy SC, Saleska SR. 2016.** Seasonality of temperate forest photosynthesis and daytime respiration. *Nature* **534**(7609): 680-683.

**Whitehead D, Barbour MM, Griffin KL, Turnbull MH, Tissue DT. 2011.** Effects of leaf age and tree size on stomatal and mesophyll limitations to photosynthesis in mountain beech (*Nothofagus solandrii* var. *cliffortioides*). *Tree Physiology* **31**(9): 985-996.

**Wingate L, Seibt U, Moncrieff JB, Jarvis PG, Lloyd J. 2007.** Variations in <sup>13</sup>C discrimination during CO<sub>2</sub> exchange by *Picea sitchensis* branches in the field. *Plant, Cell and Environment* **30**(5): 600-616.

**Yin XY, Sun ZP, Struik PC, Gu JF. 2011.** Evaluating a new method to estimate the rate of leaf respiration in the light by analysis of combined gas exchange and chlorophyll fluorescence measurements. *Journal of Experimental Botany* **62**(10): 3489-3499.

## TABLE AND FIGURES



Table 1. Gas exchange parameters of young and old leaves measured under the same environmental conditions as during growth. Gas exchange parameters include: respiration rate in light measured using the isotopic disequilibrium method ( $R_{L\ 13C}$ ,  $\mu\text{mol m}^{-2} \text{s}^{-1}$ ) or the Laisk method ( $R_{L\ \text{Laisk}}$ ,  $\mu\text{mol m}^{-2} \text{s}^{-1}$ ), respiration rate in the dark ( $R_D$ ,  $\mu\text{mol m}^{-2} \text{s}^{-1}$ ), leak coefficient ( $K_{\text{CO}_2}$ ,  $\mu\text{mol s}^{-1}$ ), net assimilation rate ( $A$ ,  $\mu\text{mol m}^{-2} \text{s}^{-1}$ ), transpiration rate ( $E$ ,  $\text{mmol m}^{-2} \text{s}^{-1}$ ), stomatal conductance to water vapour ( $g_{\text{sw}}$ ,  $\text{mol m}^{-2} \text{s}^{-1}$ ), mesophyll conductance ( $g_m$ ,  $\text{mol m}^{-2} \text{s}^{-1}$ ), apparent chloroplastic  $\text{CO}_2$  photocompensation point ( $C_i^*$ ,  $\mu\text{mol mol}^{-1}$ ), intrinsic water use efficiency ( $\text{WUE}_i=A/g_{\text{sw}}$ ,  $\mu\text{mol mol}^{-1}$ ), ratio of internal to atmospheric  $\text{CO}_2$  concentration ( $C_i/C_a$ ), ratio of chloroplastic to atmospheric  $\text{CO}_2$  concentration ( $C_c/C_a$ ). Data are shown as mean $\pm$ SE ( $n=4$ ), significant treatment effects (age, species and their interaction,  $a \times s$ ) were marked with \* when  $0.01 < p < 0.05$  or with \*\* when  $p < 0.01$ .

|                       | <i>H. vulgare</i> |                 | <i>T. aestivum</i> |                 | <i>P. vulgaris</i> |                 | <i>R. communis</i> |                 | Significance |         |              |
|-----------------------|-------------------|-----------------|--------------------|-----------------|--------------------|-----------------|--------------------|-----------------|--------------|---------|--------------|
|                       | Young             | Old             | Young              | Old             | Young              | Old             | Young              | Old             | age          | species | $a \times s$ |
| $R_{L\ 13C}$          | 1.8 $\pm$ 0.1     | 1.7 $\pm$ 0.3   | 1.0 $\pm$ 0.1      | 1.4 $\pm$ 0.2   | 1.5 $\pm$ 0.1      | 2.2 $\pm$ 0.2   | 1.5 $\pm$ 0.1      | 1.0 $\pm$ 0.1   | 0.45         | **      | *            |
| $R_{L\ \text{Laisk}}$ | 1.1 $\pm$ 0.1     | 1.4 $\pm$ 0.2   | 0.7 $\pm$ 0.1      | 0.9 $\pm$ 0.1   | 1.3 $\pm$ 0.1      | 1.7 $\pm$ 0.3   | 0.8 $\pm$ 0.2      | 0.7 $\pm$ 0.1   | 0.25         | **      | 0.31         |
| $R_D$                 | 1.9 $\pm$ 0.2     | 1.8 $\pm$ 0.1   | 1.0 $\pm$ 0.2      | 1.0 $\pm$ 0.1   | 2.3 $\pm$ 0.1      | 2.2 $\pm$ 0.2   | 2.0 $\pm$ 0.4      | 1.1 $\pm$ 0.1   | 0.07         | **      | 0.08         |
| $K_{\text{CO}_2}$     | 0.19 $\pm$ 0.06   | 0.27 $\pm$ 0.07 | 0.11 $\pm$ 0.02    | 0.15 $\pm$ 0.01 | 0.24 $\pm$ 0.07    | 0.21 $\pm$ 0.05 | 0.12 $\pm$ 0.04    | 0.18 $\pm$ 0.07 | 0.32         | 0.14    | 0.75         |
| $A$                   | 14.1 $\pm$ 0.5    | 7.5 $\pm$ 1.7   | 15.4 $\pm$ 0.6     | 8.9 $\pm$ 1.0   | 7.3 $\pm$ 0.9      | 8.3 $\pm$ 0.6   | 9.0 $\pm$ 1.9      | 7.2 $\pm$ 1.8   | **           | **      | **           |
| $E$                   | 1.5 $\pm$ 0.1     | 1.1 $\pm$ 0.1   | 1.4 $\pm$ 0.1      | 1.1 $\pm$ 0.2   | 1.0 $\pm$ 0.1      | 1.0 $\pm$ 0.1   | 0.9 $\pm$ 0.2      | 0.7 $\pm$ 0.2   | 0.06         | **      | 0.71         |
| $g_{\text{sw}}$       | 0.26 $\pm$ 0.03   | 0.11 $\pm$ 0.02 | 0.37 $\pm$ 0.06    | 0.11 $\pm$ 0.03 | 0.21 $\pm$ 0.08    | 0.12 $\pm$ 0.02 | 0.16 $\pm$ 0.09    | 0.08 $\pm$ 0.03 | **           | 0.21    | 0.36         |
| $g_m$                 | 0.25 $\pm$ 0.02   | 0.08 $\pm$ 0.03 | 0.32 $\pm$ 0.04    | 0.12 $\pm$ 0.02 | 0.09 $\pm$ 0.02    | 0.10 $\pm$ 0.01 | 0.12 $\pm$ 0.03    | 0.08 $\pm$ 0.03 | **           | **      | **           |
| $C_i^*$               | 41.8 $\pm$ 1.1    | 45.9 $\pm$ 3.8  | 40.6 $\pm$ 0.9     | 53.6 $\pm$ 2.1  | 37.3 $\pm$ 2.1     | 42.0 $\pm$ 3.9  | 44.9 $\pm$ 2.2     | 48.9 $\pm$ 7.4  | **           | 0.10    | 0.41         |
| $\text{WUE}_i$        | 57 $\pm$ 6        | 70 $\pm$ 9      | 45 $\pm$ 5         | 91 $\pm$ 12     | 46 $\pm$ 9         | 73 $\pm$ 5      | 87 $\pm$ 22        | 109 $\pm$ 23    | **           | *       | 0.58         |
| $C_i/C_a$             | 0.72 $\pm$ 0.03   | 0.72 $\pm$ 0.04 | 0.77 $\pm$ 0.02    | 0.64 $\pm$ 0.04 | 0.80 $\pm$ 0.03    | 0.69 $\pm$ 0.02 | 0.63 $\pm$ 0.07    | 0.55 $\pm$ 0.07 | *            | *       | 0.48         |
| $C_c/C_a$             | 0.56 $\pm$ 0.03   | 0.49 $\pm$ 0.02 | 0.62 $\pm$ 0.02    | 0.46 $\pm$ 0.02 | 0.56 $\pm$ 0.06    | 0.48 $\pm$ 0.01 | 0.43 $\pm$ 0.08    | 0.32 $\pm$ 0.08 | **           | **      | 0.79         |

Fig. 1 Correlation between respiration rate in light measured using the isotopic disequilibrium method ( $R_{L\ 13C}$ ) and the Laisk method ( $R_{L\ Laisk}$ ). Open symbols represent data of young leaves and filled symbols represent old leaves; *V. faba* and *G. max* were measured only on young leaves. Lines are the regression line (black solid line), upper and lower 95% confidence limits (dotted lines) and the 1:1 line (dashed line). Each symbol represents both parameter measured on the same leaf.

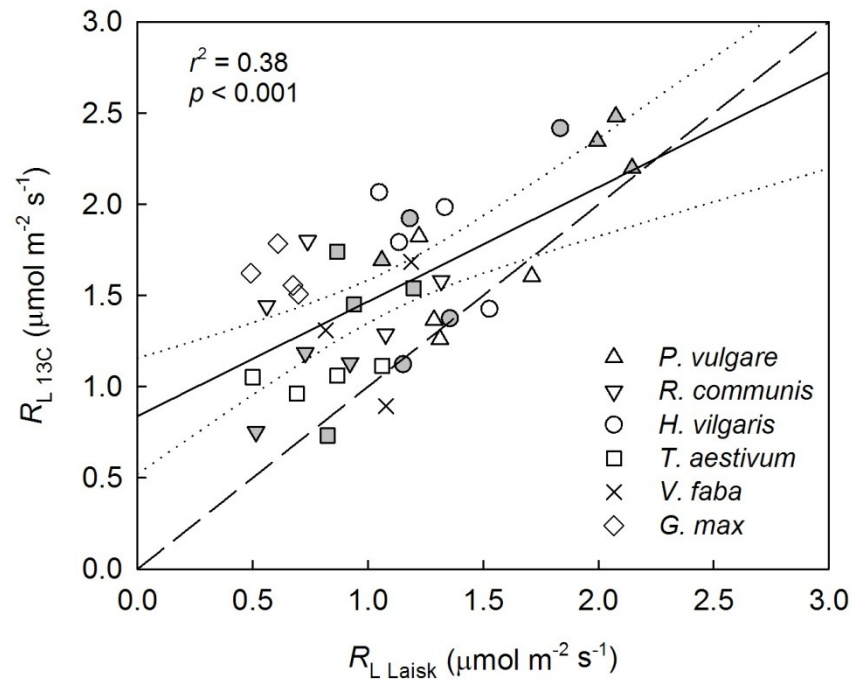

Fig. 2 The ratio of respiration in light to that in darkness measured by the isotopic disequilibrium method ( $R_{L\ 13C}/R_D$ , blue bars) or the Laisk method ( $R_{L\ Laisk}/R_D$ , black bars) of young (Y, open bars) and old (O, filled bars) leaves. Different letters indicate significant difference between means within each species measured by the same method ( $p < 0.05$ ,  $n = 4$ ).

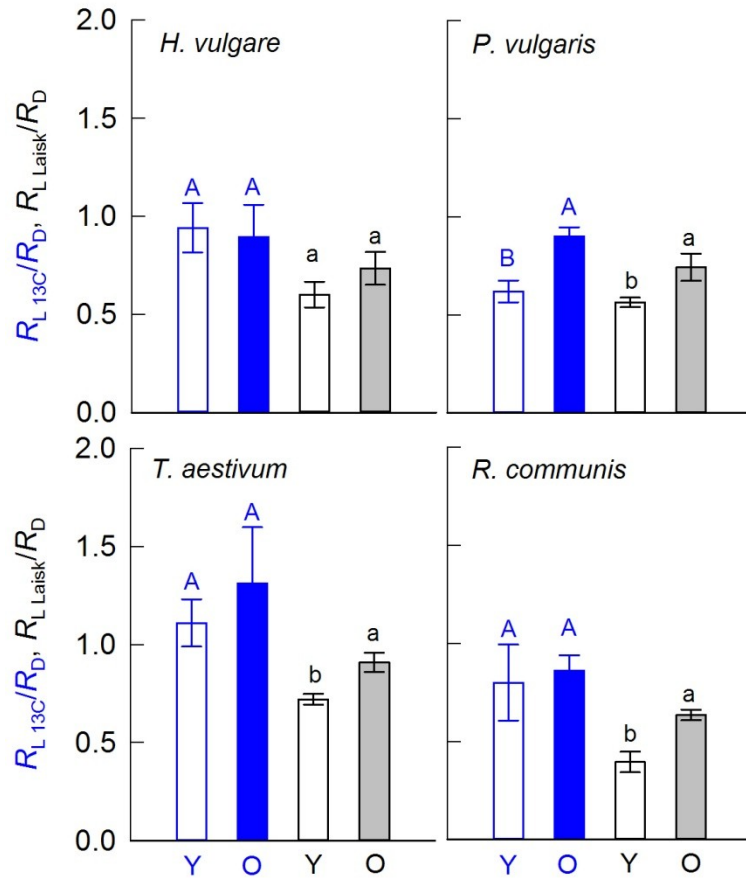

Fig. 3 Carbon isotope discrimination during net CO<sub>2</sub> assimilation ( $\Delta_A$ , triangles) and during apparent photosynthesis ( $\Delta_P$ , circles) measured using an <sup>13</sup>C enriched CO<sub>2</sub> source (red symbols) or a <sup>13</sup>C depleted CO<sub>2</sub> source (blue symbols). Panels a - d show data of individual species, and error bars are standard errors ( $n=4$ ).

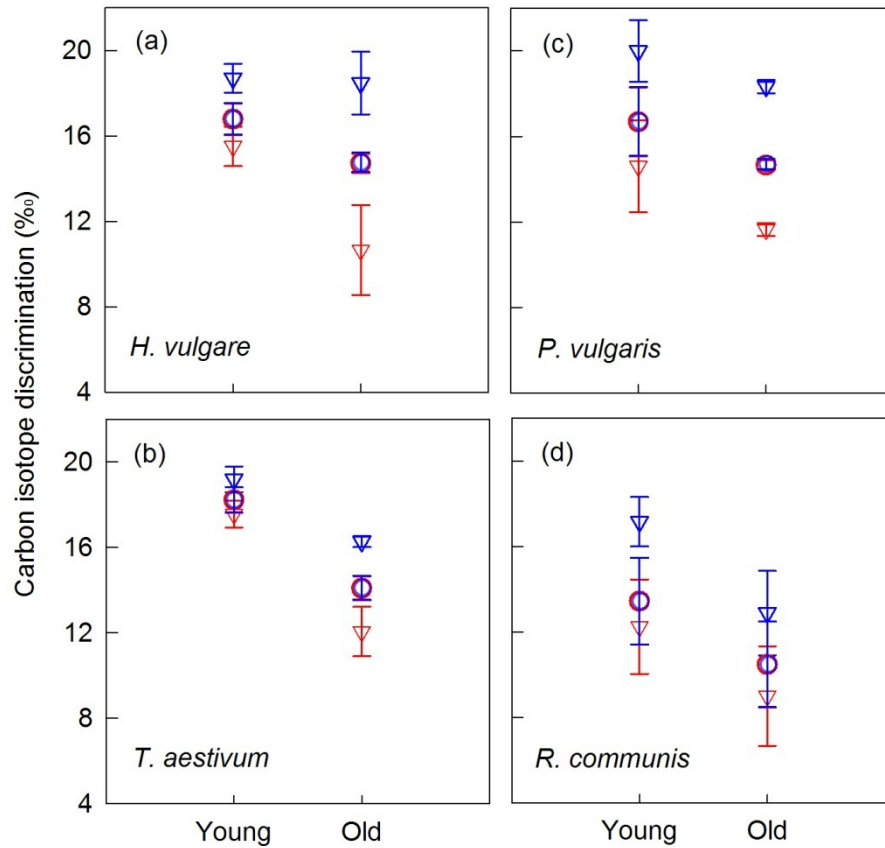

Fig. 4 Relationship between (a) chloroplastic CO<sub>2</sub> photocompensation point ( $\Gamma^*$ ) and apparent chloroplastic CO<sub>2</sub> photocompensation point ( $C_i^*$ ), and between (b) respiration in light measured using modified Laisk method based on  $C_c$  ( $R_{L\text{ Laisk }cc}$ ) and that measured using the Laisk method ( $R_{L\text{ Laisk}}$ ). Species are separately marked with different symbols (see Fig. 1), blue symbols represent data of young leaves and red symbols represent old leaves. Black solid line is the regression line, and dashed line is the 1:1 line. Each symbol represents the mean and standard error of a species ( $n=4$ ).

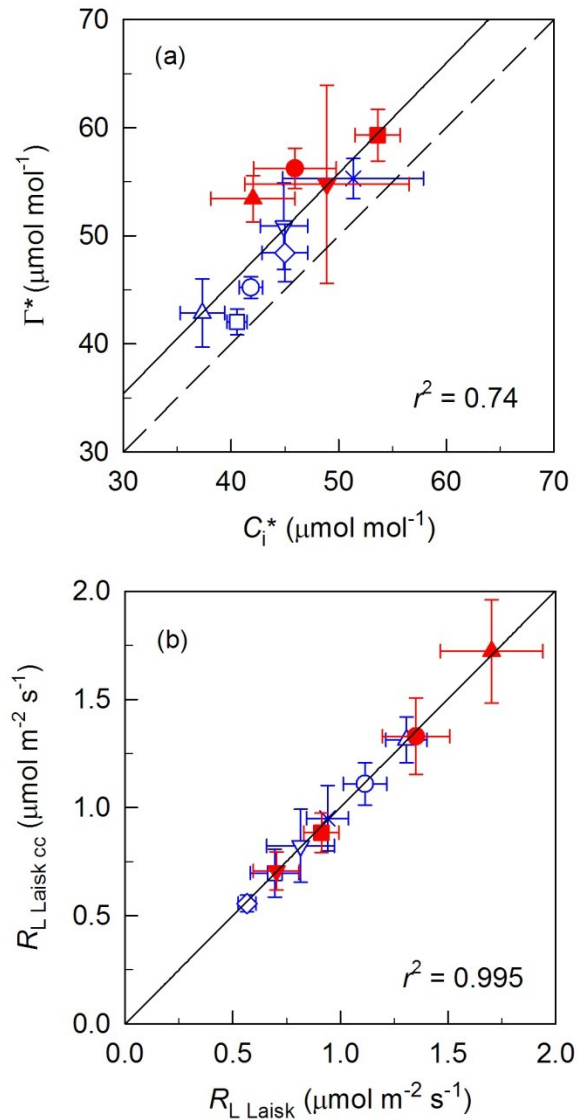

Source: https://www.biorxiv.org/content/10.1101/201038v1.full.pdf
